# Supplementary material for: Pressure induced phase transitions of bulk CsGeCl3 and ultrafast laser pulse induced excited-state properties of CsGeCl3 quantum dots
Source: Royal Society of Chemistry journal article supplement (doi:10.1039/d2cp02162e), 2022-01-01
Supplement: d2cp02162e1.pdf [file d2cp02162e1.pdf]

## Supporting Information

### **Pressure induced phase transitions of bulk CsGeCl<sub>3</sub> and ultrafast laser pulses induced excited-state properties of CsGeCl<sub>3</sub> quantum dots**

Jiasi Qiu,<sup>‡</sup> Xiaoyu Kuang,<sup>‡</sup> Miao Yu, Zhangyao Xing, Siyuan Zhou, Jichao Chen, Jiancheng Ma, and Aijie Mao\*

Institute of Atomic and Molecular Physics, Sichuan University, Chengdu 610065, China

Table S1. Lattice parameters (a, b, c) and reduced atomic coordinates (x, y, z) of CsGeCl<sub>3</sub> for the *R3m* (0 GPa), *Cm* (0 GPa), *Pm3̄m* (9 GPa), ppPv-*Pnma* (40 GPa), and *I4mm* (100 GPa), respectively.

|                               | Atoms | Wyck. | Coordinates       |                       |                    |
|-------------------------------|-------|-------|-------------------|-----------------------|--------------------|
|                               |       |       | x                 | y                     | z                  |
| <i>R3m</i><br>(0 GPa)         |       |       | a=7.4625Å         | b=7.4625Å             | c=9.1906Å          |
|                               |       |       | $\alpha=90^\circ$ | $\beta=90^\circ$      | $\gamma=120^\circ$ |
|                               | Cs    | 3a    | 0.00000           | 0.00000               | 0.82449            |
|                               | Ge    | 3a    | 0.66667           | 0.33333               | 0.64539            |
|                               | Cl    | 9b    | 0.49106           | 0.98211               | 0.83505            |
| <i>Cm</i><br>(0 GPa)          |       |       | a=7.4907Å         | b=7.4619Å             | c=5.2887Å          |
|                               |       |       | $\alpha=90^\circ$ | $\beta=89.6633^\circ$ | $\gamma=90^\circ$  |
|                               | Cl    | 4b    | 0.74074           | 0.23662               | 0.98886            |
|                               | Cl    | 2a    | 0.00415           | 0.50000               | 0.46214            |
|                               | Cs    | 2a    | 0.00578           | -0.00000              | 0.49057            |
|                               | Ge    | 2a    | 0.51819           | -0.00000              | 0.00354            |
| <i>Pm3̄m</i><br>(9 GPa)       |       |       | a=4.8976Å         | b=4.8976Å             | c=4.8976Å          |
|                               |       |       | $\alpha=90^\circ$ | $\beta=90^\circ$      | $\gamma=90^\circ$  |
|                               | Cs    | 1a    | 0.00000           | 0.00000               | 0.00000            |
|                               | Ge    | 1b    | 0.50000           | 0.50000               | 0.50000            |
|                               | Cl    | 3c    | -0.00000          | 0.50000               | 0.50000            |
| ppPv- <i>Pnma</i><br>(40 GPa) |       |       | a=7.8253Å         | b=3.1454Å             | c=13.7519Å         |
|                               |       |       | $\alpha=90^\circ$ | $\beta=90^\circ$      | $\gamma=90^\circ$  |
|                               | Cs    | 4c    | 0.54848           | 0.25000               | 0.84780            |
|                               | Ge    | 4c    | 0.42136           | 0.25000               | 0.43675            |
|                               | Cl    | 4c    | 0.29301           | 0.25000               | -0.00332           |
|                               | Cl    | 4c    | 0.91392           | 0.25000               | 0.84718            |
|                               | Cl    | 4c    | 0.76088           | 0.25000               | 0.19868            |
| <i>I4mm</i><br>(100 GPa)      |       |       | a=3.0417Å         | b=3.0417Å             | c=14.2074Å         |
|                               |       |       | $\alpha=90^\circ$ | $\beta=90^\circ$      | $\gamma=90^\circ$  |
|                               | Cs    | 2a    | 0.00000           | -0.00000              | 0.23278            |
|                               | Cl    | 2a    | 0.00000           | -0.00000              | 0.61446            |
|                               | Cl    | 2a    | 0.00000           | -0.00000              | 0.44001            |
|                               | Ge    | 2a    | -0.50000          | 0.50000               | 0.51642            |
|                               | Cl    | 2a    | -0.50000          | 0.50000               | 0.34796            |

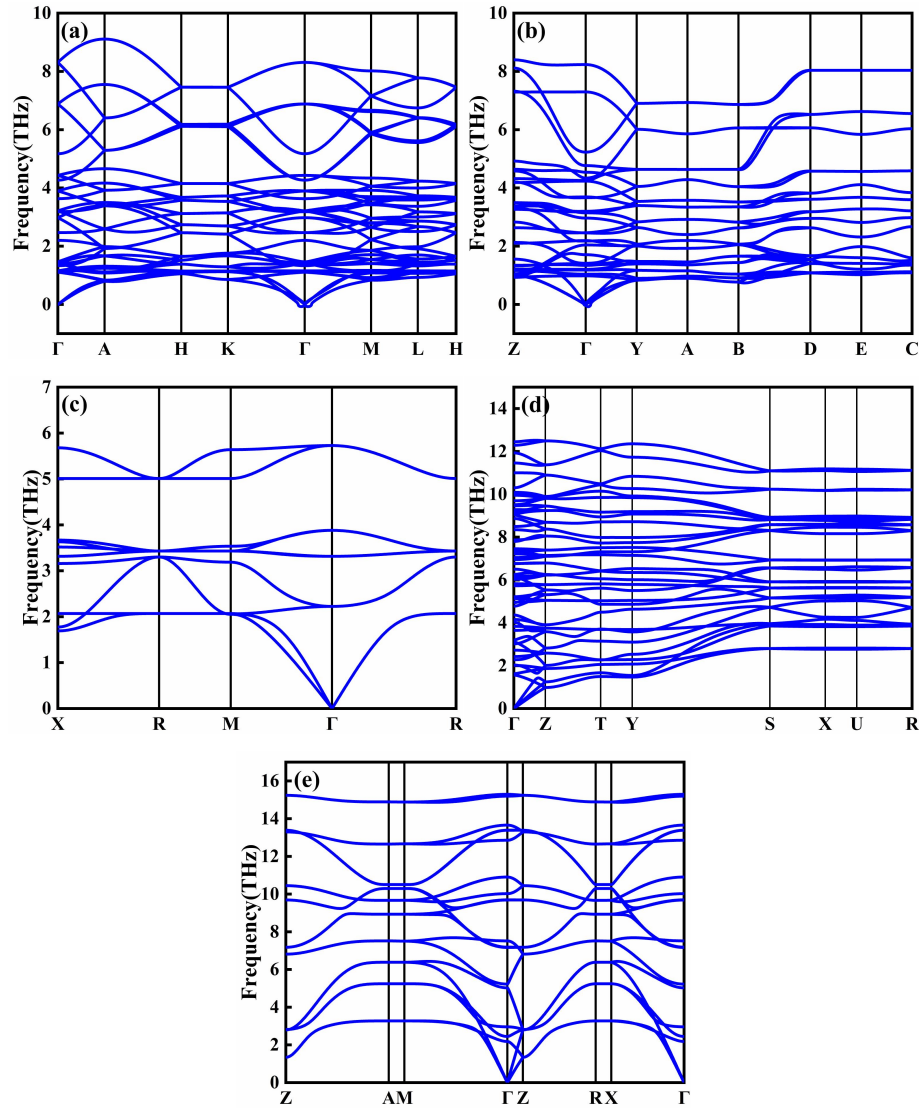

Fig. S1. Calculated phonon dispersions for (a)  $R3m$  at 0 GPa, (b)  $Cm$  at 0 GPa, (c)  $Pm\bar{3}m$  at 9 GPa, (d) ppPv- $Pnma$  at 40 GPa, and (e)  $I4mm$  at 100 GPa, respectively.

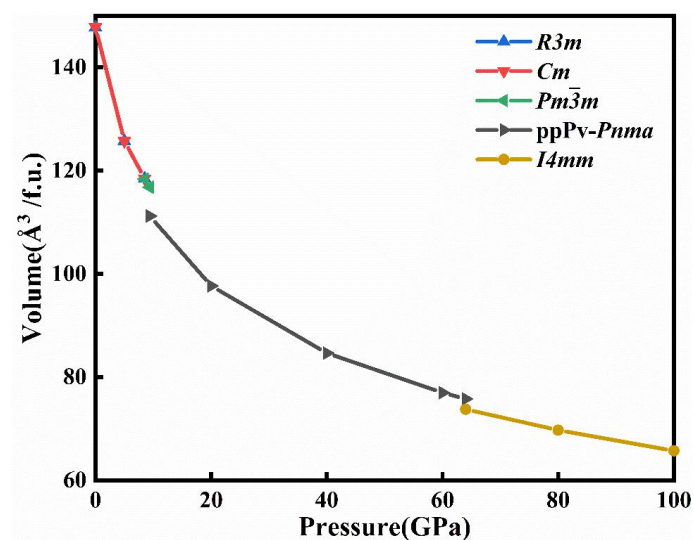

Fig. S2. The volume of different structures for CsGeCl<sub>3</sub> as a function of pressure.

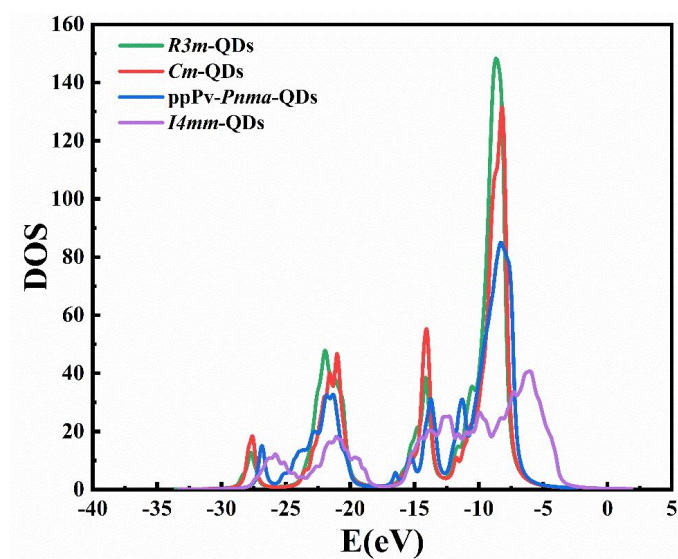

Fig. S3. The density of states (DOS) obtained from the ground-state information for R3m-QDs, Cm-QDs, ppPv-Pnma-QDs, and I4mm-QDs, respectively.

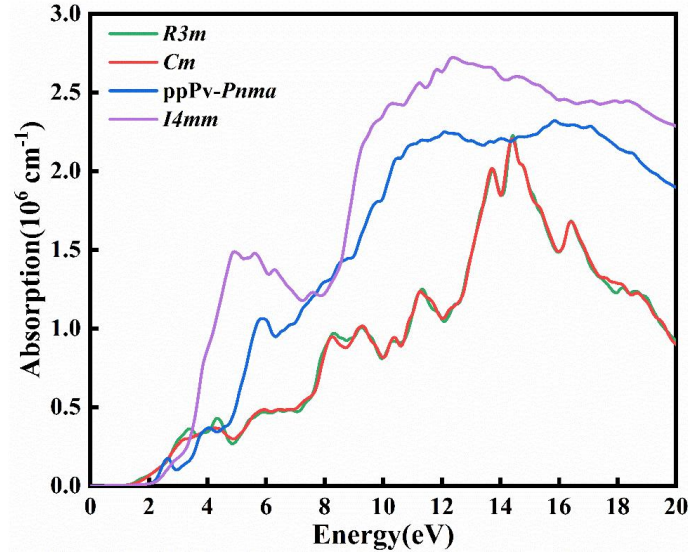

Fig. S4. The absorption spectra of bulk structures CsGeCl<sub>3</sub> for *R3m* (0 GPa), *Cm* (0 GPa), ppPv-*Pnma* (40 GPa), and *I4mm* (100 GPa), respectively.

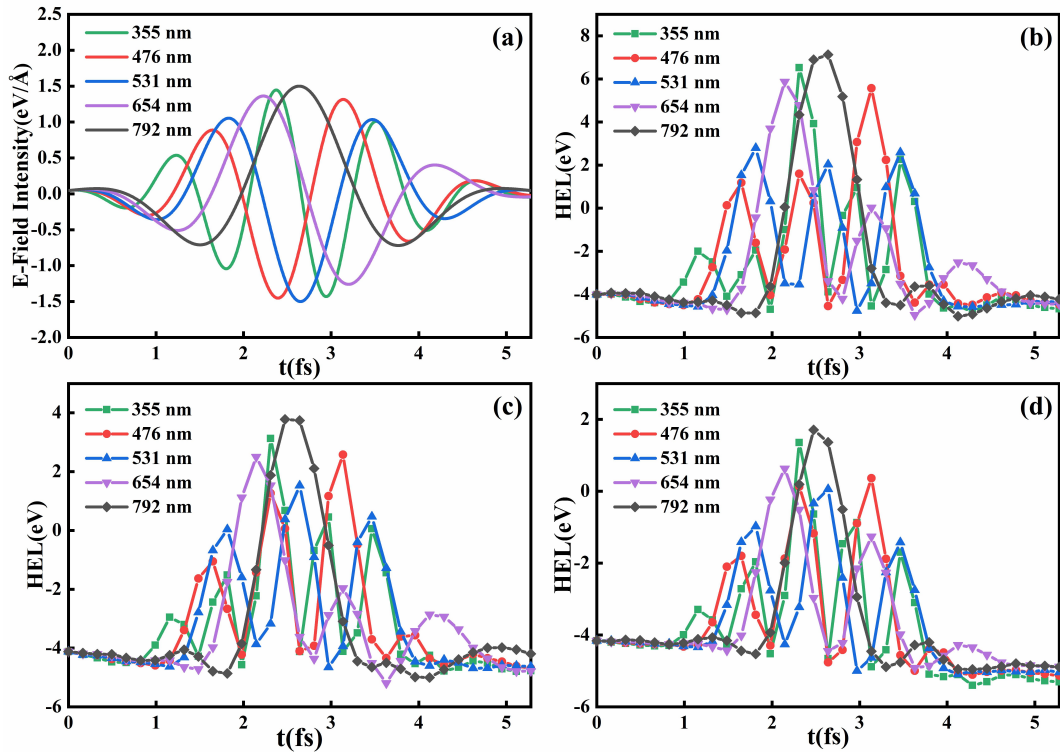

Fig. S5. (a) The laser oscillograph, (b)-(d) the HEL in *R3m*-QDs, *Cm*-QDs, and ppPv-*Pnma*-QDs with ultrafast lasers for the intensity of 1.5 eV/Å and the different wavelengths of 355 nm, 476 nm, 531 nm, 654 nm, and 792 nm are selected, respectively.
